# Supplementary material
Source: publisher figshare collection journal article supplement (https://geolsoc.figshare.com/ndownloader/files/22730858)
Supplement: Supplementary file 1 [file 22730858]

# List of files

**GeologyNC_GSL.mdb**: Personal Geodatabase Esri format, Arcgis v 10. 4, corresponding to the geological map of Fig. 1.2. The personal geodatabase contains one feature dataset “Geology”, which in turn contains a polygon feature class: “Surface”, and a polyline feature class: “Line”.

**GeologyNC_GSL_Surface.shp, GeologyNC_GSL_Surface. shx, GeologyNC_GSL_Surface. dbf, GeologyNC_GSL_Surface.prj**: Polygon shapefiles, corresponding to the geological map of Fig. 1.2.

**GeologyNC_GSL_Line.shp, GeologyNC_GSL_Line. shx, GeologyNC_GSL_Line. dbf, GeologyNC_GSL_Line.prj**: polyline shapefiles, corresponding to the geological map of Fig. 1.2.

**Surface.lyr, Line.lyr**: Symbology files.

# List of attributes, format, and possible values

The attributes “Assemblage” and “Terrane” are fully documented. Due to limited number of characters in the shapefile format (8.3 format) “Terrane” attribute corresponds to “Terrane, Nappe, or Sequence” of Fig. 1.3. The attribute “Group_” is partially documented. The attribute “Formation” is not documented due to the small scale of Fig. 1.2 where formations do not appear. There is no “Member“ attribute.

## Feature class Surface

### Attribute Assemblage, (Text, 50):

Possible values: Basement; Post-Obduction; Pre-Obduction; Subduction-Obduction

### Attribute Terrane (Text, 50):

Possible values: Boghen Terrane; Diahot-Panie Metamorphic Complex; Grande Terre Sequence; Koh-Central Terrane, Central Range Volcaniclastic; Koh-Central Terrane, Koh Ophiolite; Loyalty Sequence; Montagnes Blanches Nappe; Peridotites Nappe; Pouébo Terrane; Poya Terrane; Rift Sequence; Syntectonic Sequence; Téremba Terrane.

### Attribute Group_ (Text, 50):

Possible values: Bourail; Col de Boghen; Dumbea; Fluvio-Littoral; Harzburgite; Koné Facies; Late Oligocene Granitoids; Lherzolite; Mare; Nepoui; Nepoui-Koumac; Poya Terrane Basalts ;Regolith; Sommet Khian.

### Attribute Formation (Text, 50):

Void.

### Attribute Lithology (Text, 50):

Possible values: Alluvium; Argilite, chert; Argilite, chert, micrite; Argilte, silt, dolerite; Basalt; Basalt, gabbro; Chert, basalt, dolerite; Conglomerate, sandstone, limestone; Cumulate; Dunite; Ferricrete, laterite; Granitoid; Greywacke; Harzburgite; Lherzolite; Limestone, reef; Meta-basalt; Meta-greywacke; Ophioliic melange; Reef; Reworked laterite, conglomerate; Rhodolith and reefal limestone; Sandstone, argilite, coal; Schist; Schist, gneiss; Schist, metabasalt; Serpentinite; Turbidite, breccia.

### Attribute Legend (Text, 500)

Concatenation of string values of the attribute “Assemblage” + “Terrane” + “Group_” + “Lithology” resulting in one unique value, each one corresponding to one box in the legend of Fig. 1.2

## Feature class Line

### Attribute Nature (Text, 50)

Possible values: Coast line; Major fault; Normal contact; Thrust.

### Attribute Visibility (Text, 50)

Possible values: Inferred; Observed.

### Attribute Legend (Text, 100)

Concatenation of string values of “Nature” + “Visibility”.
